# Supplementary material
Source: publisher figshare collection journal article supplement (https://springernature.figshare.com/ndownloader/files/15569288)
Supplement: Supplementary file 1 [file 15569288]

## Sheet: Feuil1
R2G				CK-R2G				EG				CK-EG
Sample name	Rep1	Rep2	Rep3	Sample name	Rep1	Rep2	Rep3	Sample name	Rep1	Rep2	Rep3	Sample name	Rep1	Rep2	Rep3
R2G-0	T01	T02	T03					EG-0	T04	T05	T06
RR2G-2	T07	T08	T09					EG-2	T10	T11	T12
R2G-4	T16	T17	T18	CK-R2G-4	T13	T14	T15	EG-4	T22	T23	T24	CK-EG-4	T19	T20	T21
R2G-6	T25	T26	T27					EG-6	T28	T29	T30
R2G-8	T34	T35	T36	CK-R2G-8	T31	T32	T33	EG-8	T40	T41	T42	CK-EG-8	T37	T38	T39
R2G-10	T43	T44	T45					EG-10	T46	T47	T48
R2G-12	T52	T53	T54	CK-R2G-12	T49	T50	T51	EG-12	T58	T59	T60	CK-EG-12	T55	T56	T57
R2G-14	T61	T62	T63					EG-14	T64	T65	T66
R2G-16	T70	T71	T72	CK-R2G-16	T67	T68	T69	EG-16	T76	T77	T78	CK-EG-16	T73	T74	T75
R2G-18	T79	T80	T81					EG-18	T82	T83	T84
R2G-20	T88	T89	T90	CK-R2G-20	T85	T86	T87	EG-20	T94	T95	T96	CK-EG-20	T91	T92	T93
R2G-22	T100	T101	T102					EG-22	T97	T98	T99
R2G-24	T106	T107	T108	CK-R2G-24	T103	T104	T105	EG-24	T112	T113	T114	CK-EG-24	T109	T110	T111
R2G-28	T115	T116	T117					EG-28	T118	T119	T120
R2G-32	T424	T125	T126	CK-R2G-32	T121	T122	T123	EG-32	T130	T131	T132	CK-EG-32	T127	T128	T129
R2G-36	T133	T134	T135					EG-36	T136	T137	T138
R2G-38	T139	T140	T141					EG-38	T142	T143	T144
R2G-40	T148	T149	T150	CK-R2G-40	T145	T146	T147	EG-40	T154	T155	T156	CK-EG-40	T151	T152	T153
R2G-42	T157	T158	T159					EG-42	T160	T161	T162
R2G-44	T166	T167	T168	CK-R2G-44	T163	T164	T165	EG-44	T172	T173	T174	CK-EG-44	T169	T170	T171
R2G-46	T175	T176	T177					EG-46	T178	T179	T180
R2G-48	T184	T185	T186	CK-R2G-48	T181	T182	T183	EG-48	T190	T191	T192	CK-EG-48	T187	T188	T189
								EG-48-W	T193	T194	T195
